# Supplementary material
Source: Springer Nature journal article supplement (https://www.springermedizin.de/resource/supplementary/12889_2007_779_MOESM1_ESM.pdf/9501752)

# Secular trends of mean BMI in pregnant nulliparous women

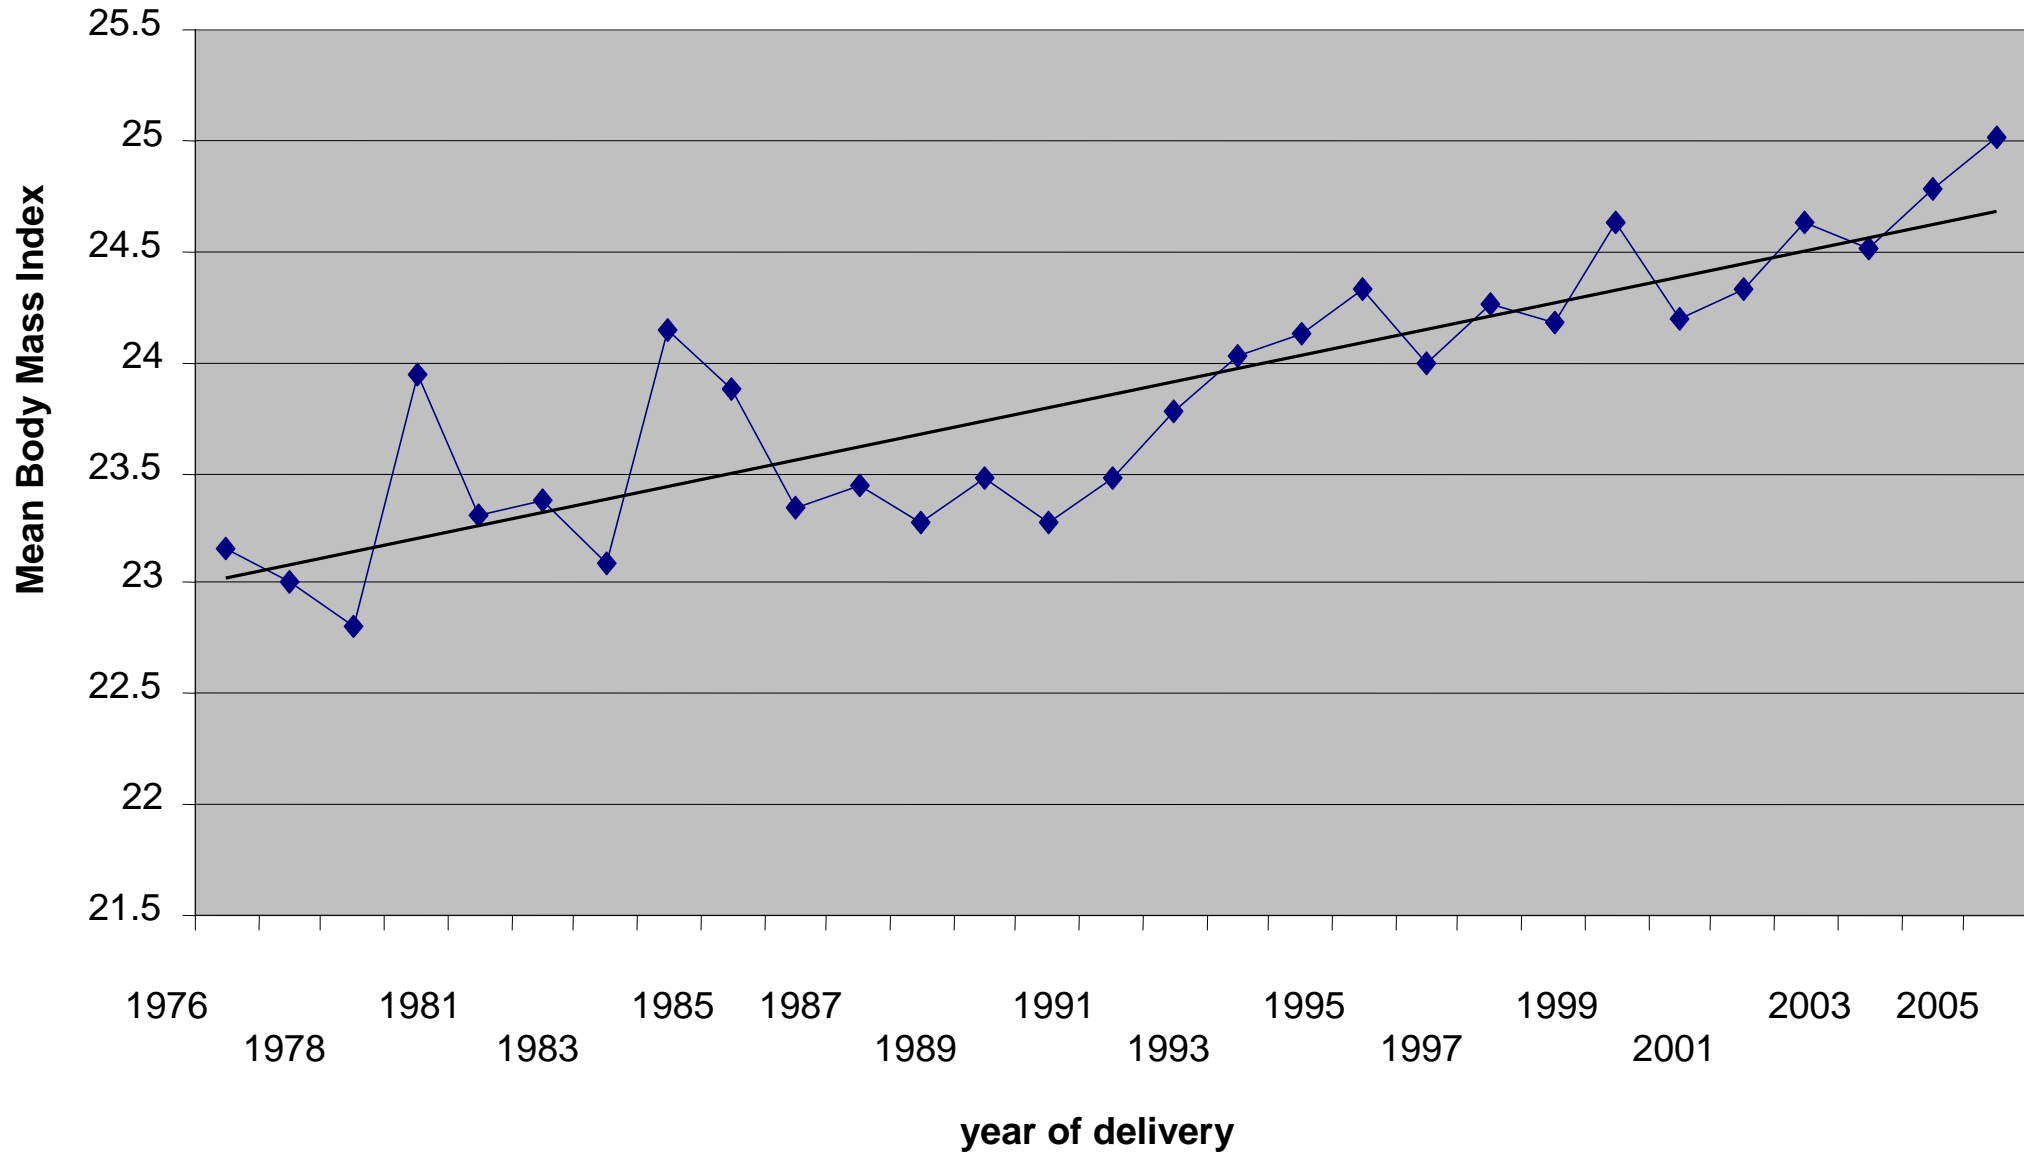

Supplement: MOESM1 [file 9501752]
